# Supplementary material
Source: HighWire-hosted journal article supplement (http://ajnr-stage2.highwire.org/highwire/filestream/181557/field_highwire_adjunct_files/0/1153_tables.pdf)
Supplement: 1153_tables.pdf [file 1153_tables.pdf]

**On-line Table 1: Characteristics of patients "with" versus those "without" complete early recanalization**

| Characteristics                            | Complete Recanalization | Incomplete Recanalization | P Value |
|--------------------------------------------|-------------------------|---------------------------|---------|
| Patient demographics                       |                         |                           |         |
| No. of patients, <i>n</i>                  | 19                      | 25                        |         |
| Age, mean (SD), y                          | 67.3 (±18.7)            | 73.3 (±10.7)              | .19     |
| Female, <i>n</i> (%)                       | 12 (63.2)               | 12 (48.0)                 | .37     |
| Clinical characteristics                   |                         |                           |         |
| Admission NIHSS score, median (range)      | 19 (4–24)               | 19 (5–28)                 | .27     |
| Mean onset-to-imaging time, min            | 137.3 SD 60.1           | 115.0 SD 72.4             | .24     |
| mRS 0–2 at 3-mo follow-up, <i>n</i> (%)    | 14 (73.7)               | 10 (40.0)                 | .04     |
| Initial imaging characteristics            |                         |                           |         |
| NCCT ASPECTS, median (range)               | 8 (1–10)                | 9 (3–10)                  | .03     |
| CTA-SI ASPECTS, median (range)             | 7 (0–10)                | 7 (0–10)                  | .38     |
| CTA-SI volume, mean (SD), cc               | 34.8 (±55.0)            | 48.3 (±58.1)              | .4      |
| CTA-SI volume 0.0–100.0 mL, <i>n</i> (%)   | 17 (89.5)               | 19 (76.0)                 | .37     |
| CTA-SI volume 100.1–200.0 mL, <i>n</i> (%) | 1 (5.3)                 | 5 (20.0)                  |         |
| CTA-SI volume >201.0 mL, <i>n</i> (%)      | 1 (5.3)                 | 1 (4.0)                   |         |
| Proximal MCA stem occlusion, <i>n</i> (%)  | 11 (58.0)               | 13 (52.0)                 | .77     |
| Treatment characteristics                  |                         |                           |         |
| Patients receiving IA therapy alone        | 13                      | 16                        | .2      |
| Patients receiving IV therapy alone        | 2                       | 7                         |         |
| Patients receiving IV and IA therapy       | 2                       | 2                         |         |
| Untreated patients                         | 2                       | 0                         |         |

**Note:**—ASPECTS indicates Alberta Stroke Program Early Computed Tomography Score; CTA-SI, CT angiographic source image; IA, intra-arterial; IV, intravenous; MCA, middle cerebral artery; mRS, modified Rankin Scale; NIHSS, National Institutes of Health Stroke Scale; NCCT, noncontrast CT.

**On-line Table 2: Univariate analysis of admission characteristics versus final mRS**

| Characteristic                   | Complete Recanalization              |                | Incomplete Recanalization            |                |
|----------------------------------|--------------------------------------|----------------|--------------------------------------|----------------|
|                                  | Correlation Coefficient ( <i>R</i> ) | <i>P</i> Value | Correlation Coefficient ( <i>R</i> ) | <i>P</i> Value |
| CTA-SI lesion volume             | 0.50                                 | .03            | 0.68                                 | .0002          |
| Onset-to-imaging time            | 0.63                                 | .004           | 0.037                                | .86            |
| NIHSS score                      | 0.11                                 | .66            | 0.52                                 | .0008          |
| Proximal MCA stem occlusion      | 0.66                                 | .002           | 0.27                                 | .02            |
| CTA-SI ASPECTS                   | −0.28                                | .24            | −0.57                                | .004           |
| CTA-SI ASPECTS-M5 involvement    | 0.26                                 | .29            | 0.51                                 | .01            |
| CTA-SI ASPECTS-M6 involvement    | 0.28                                 | .24            | 0.47                                 | .02            |
| Lenticular nucleus involvement   | 0.41                                 | .08            | 0.23                                 | .27            |
| Insular involvement              | 0.099                                | .69            | 0.55                                 | .004           |
| Sylvian fissure collateral score | −0.19                                | .43            | −0.088                               | .68            |
| Leptomeningeal collateral score  | −0.26                                | .28            | −0.029                               | .89            |

**Note:**—ASPECTS, Alberta Stroke Program Early Computed Tomography Score; CTA-SI, computed tomography angiography source images; M5, MCA region 5 in ASPECTS system; M6, MCA region 6 in ASPECTS system; NIHSS, National Institutes of Health Stroke Scale; mRS, modified Rankin Scale; MCA, middle cerebral artery.
